# Supplementary material for: The Mechanisms of Thiosulfate Toxicity against Saccharomyces cerevisiae
Source: MDPI journal article supplement (doi:10.3390/antiox10050646), 2021-04-22
Supplement: s1 [file s1]

## Supplementary information

### The mechanisms of thiosulfate toxicity against *Saccharomyces cerevisiae*

Figure S1: The lethal effect of sulfur species on *S. cerevisiae* at different pH.

Figure S2: The release of H<sub>2</sub>S from thiosulfate by yeast cells.

Figure S3: Thiosulfate tolerance of different *S. cerevisiae* strains.

Figure S4: The reaction of thiosulfate with Cu<sup>2+</sup>.

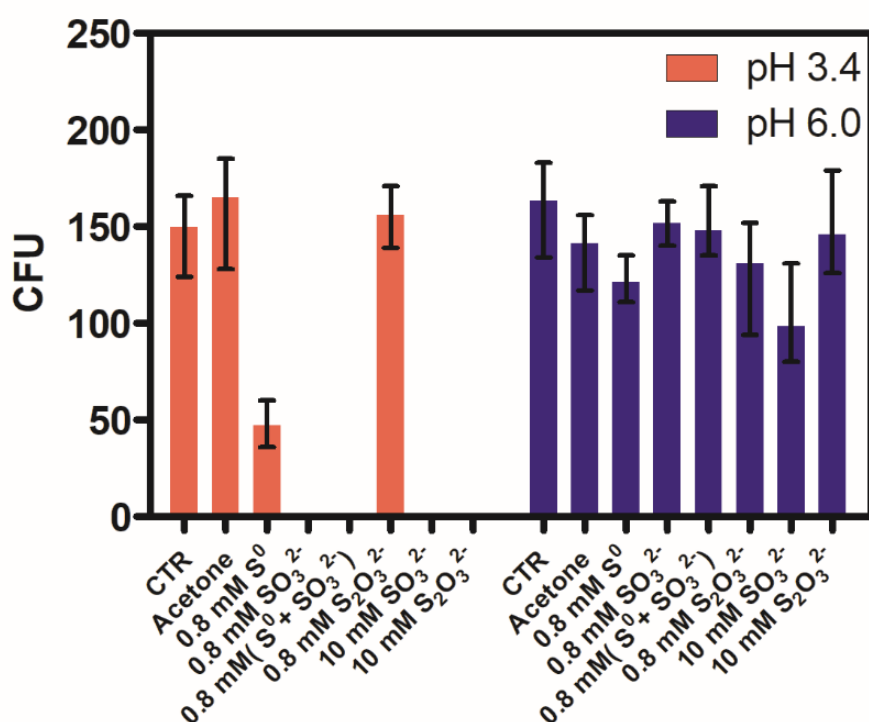

**Figure S1: The lethal effect of sulfur species on *S. cerevisiae* at different pH.** Equal number of yeast cells ( $OD_{600nm} = 1$ ) were incubated in 1 mL citric acid-sodium phosphate dibasic buffer (pH 3.4 or 6) with S<sup>0</sup>, sulfite, thiosulfate, or the combination of S<sup>0</sup> and sulfite at 30°C for 1 h. The suspensions were then diluted with sterile water by 10<sup>4</sup> times, 100  $\mu$ L of dilutions was spread on the YPD plate and cultured at 30°C for two days. Then the CFUs (colony formation units) was calculated. CTR (control): yeast cells suspend in the buffer without sulfur addition.

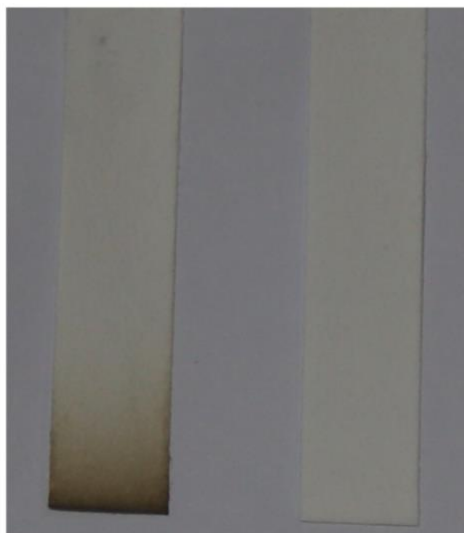

**Figure S2: The release of H<sub>2</sub>S from thiosulfate by yeast cells.** The wild type and mutant (*RDL1* deletion strain) were subjected to sulfur starvation for two days. Thiosulfate was added to 1 mM to 3-ml cell cultures (OD<sub>600</sub> of 1) and incubated for 2 h at room temperature. Detection of H<sub>2</sub>S production in the gas phase was done with lead-acetate paper strips. Left: wild type; Right: *Δrdl1* strain.

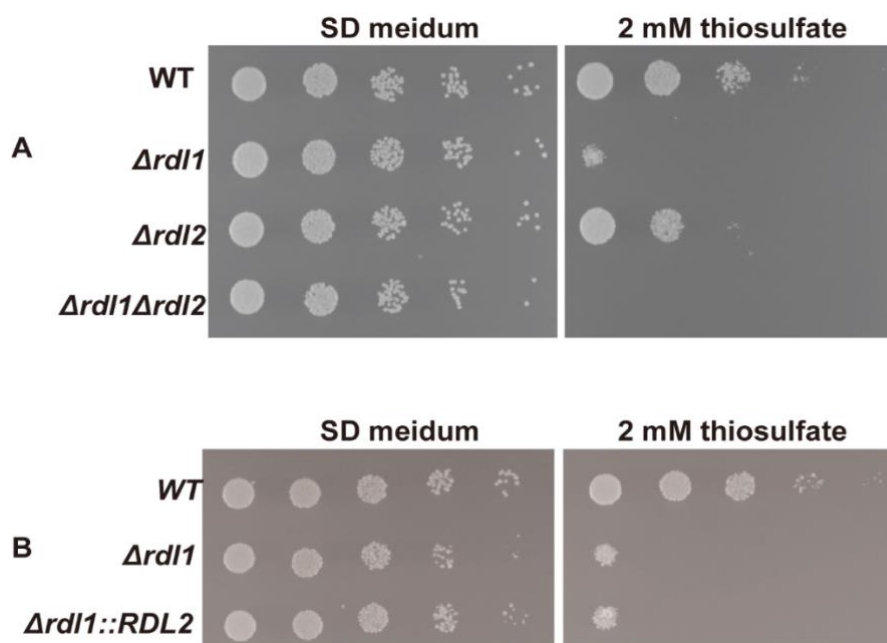

**Figure S3: Thiosulfate tolerance of different *S. cerevisiae* strains.** The wild type and the mutant strains incubated in SD plate or SD plate with 2 mM thiosulfate.

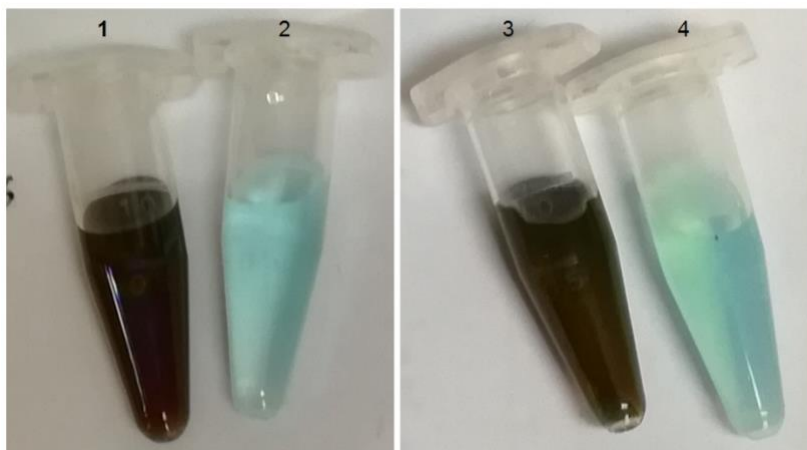

**Figure S4: The reaction of thiosulfate with  $\text{Cu}^{2+}$ .** 1&3) the mixture of 10 mM thiosulfate with 10 mM copper chloride at room temperature; 2&4) 10 mM copper chloride. 1&2) 50 mM Tris-HCl, pH 7.6; 3&4) 50 mM HEPES, pH 7.0.
